# Supplementary material
Source: HighWire-hosted journal article supplement (http://www.qdcxjkg.com/highwire/filestream/132728/field_highwire_adjunct_files/1/ERJ-01501-2015_Supplementarymaterial_table_E1.pdf)
Supplement: ERJ-01501-2015_Supplementarymaterial_table_E1.pdf [file ERJ-01501-2015_Supplementarymaterial_table_E1.pdf]

Table E1

**Protocol for reduction in dosages of prednisolone**

| <b>Starting dosage<br/>of prednisolone<br/>(mg/day)</b> | <b>Time A</b> | <b>Week 16</b> | <b>Time B</b> |
|---------------------------------------------------------|---------------|----------------|---------------|
| <b>20</b>                                               | <b>15</b>     | <b>10</b>      | <b>10</b>     |
| <b>17.5</b>                                             | <b>12.5</b>   | <b>7.5</b>     | <b>7.5</b>    |
| <b>15</b>                                               | <b>10</b>     | <b>7.5</b>     | <b>7.5</b>    |
| <b>12.5</b>                                             | <b>7.5</b>    | <b>5</b>       | <b>5</b>      |
| <b>10</b>                                               | <b>7.5</b>    | <b>5</b>       | <b>5</b>      |
| <b>7.5</b>                                              | <b>5</b>      | <b>2.5</b>     | <b>2.5</b>    |
| <b>5</b>                                                | <b>2.5</b>    | <b>0</b>       | <b>0</b>      |
